# Supplementary material
Source: PubMed Central journal article supplement (PMC6905482)
Supplement: DC190937SupplementaryData.pdf [file DC190937SupplementaryData.pdf]

SUPPLEMENTARY DATA

**Supplementary Table S1.** Hematocrit (%) by time point through 52 weeks of treatment

|                                     | Placebo      | SOTA 200 mg  | SOTA 400 mg  |
|-------------------------------------|--------------|--------------|--------------|
|                                     | (n = 526)    | (n = 524)    | (n = 525)    |
| <b>Baseline</b>                     |              |              |              |
| N                                   | 523          | 523          | 524          |
| Mean (SE)                           | 41.96 (0.16) | 41.85 (0.16) | 41.98 (0.16) |
| <b>Week 12</b>                      |              |              |              |
| N                                   | 497          | 497          | 504          |
| LS mean CFB (SE)                    | 0.12 (0.11)  | 1.88 (0.11)  | 2.00 (0.11)  |
| LS mean difference (SE) vs. placebo |              | 1.76 (0.15)  | 1.88 (0.15)  |
| 95% CI                              |              | 1.46 , 2.05  | 1.59 , 2.17  |
| P-value                             |              | <0.0001      | <0.0001      |
| <b>Week 24</b>                      |              |              |              |
| N                                   | 483          | 484          | 487          |
| LS mean CFB (SE)                    | 0.13 (0.12)  | 1.78 (0.12)  | 1.97 (0.12)  |
| LS mean difference (SE) vs. placebo |              | 1.65 (0.16)  | 1.84 (0.16)  |
| 95% CI                              |              | 1.34 , 1.96  | 1.53 , 2.15  |
| P-value                             |              | <0.0001      | <0.0001      |
| <b>Week 52</b>                      |              |              |              |
| N                                   | 378          | 390          | 377          |
| LS mean CFB (SE)                    | 0.02 (0.13)  | 1.83 (0.13)  | 1.92 (0.13)  |
| LS mean difference (SE) vs. placebo |              | 1.81 (0.17)  | 1.89 (0.17)  |
| 95% CI                              |              | 1.48 , 2.14  | 1.56 , 2.23  |
| P-value                             |              | <0.0001      | <0.0001      |

SUPPLEMENTARY DATA

**Supplementary Table S2.** Uric acid (mg/dL) by time point through 52 weeks of treatment

|                                     | Placebo      | SOTA 200 mg  | SOTA 400 mg  |
|-------------------------------------|--------------|--------------|--------------|
|                                     | (n = 526)    | (n = 524)    | (n = 525)    |
| <b>Baseline</b>                     |              |              |              |
| N                                   | 526          | 524          | 525          |
| Mean (SE)                           | 4.51 (0.05)  | 4.53 (0.05)  | 4.45 (0.05)  |
| <b>Week 4</b>                       |              |              |              |
| N                                   | 512          | 502          | 505          |
| LS mean CFB (SE)                    | 0.04 (0.03)  | -0.25 (0.03) | -0.38 (0.03) |
| LS mean difference (SE) vs. placebo |              | -0.29 (0.04) | -0.42 (0.04) |
| 95% CI                              |              | -0.37, -0.21 | -0.50, -0.34 |
| P-value                             |              | <0.0001      | <0.0001      |
| <b>Week 12</b>                      |              |              |              |
| N                                   | 487          | 486          | 492          |
| LS mean CFB (SE)                    | 0.03 (0.03)  | -0.22 (0.03) | -0.29 (0.03) |
| LS mean difference (SE) vs. placebo |              | -0.25 (0.04) | -0.32 (0.04) |
| 95% CI                              |              | -0.33, -0.16 | -0.40, -0.23 |
| P-value                             |              | <0.0001      | <0.0001      |
| <b>Week 24</b>                      |              |              |              |
| N                                   | 479          | 478          | 477          |
| LS mean CFB (SE)                    | 0.05 (0.03)  | -0.21 (0.03) | -0.29 (0.03) |
| LS mean difference (SE) vs. placebo |              | -0.26 (0.05) | -0.33 (0.05) |
| 95% CI                              |              | -0.35, -0.17 | -0.42, -0.24 |
| P-value                             |              | <0.0001      | <0.0001      |
| <b>Week 52</b>                      |              |              |              |
| N                                   | 374          | 393          | 381          |
| LS mean CFB (SE)                    | -0.07 (0.04) | -0.24 (0.04) | -0.35 (0.04) |
| LS mean difference (SE) vs. placebo |              | -0.17 (0.05) | -0.28 (0.05) |
| 95% CI                              |              | -0.27, -0.08 | -0.37, -0.18 |
| P-value                             |              | 0.0003       | <0.0001      |

SUPPLEMENTARY DATA

Supplementary Figure S1. eGFR CKD-EPI

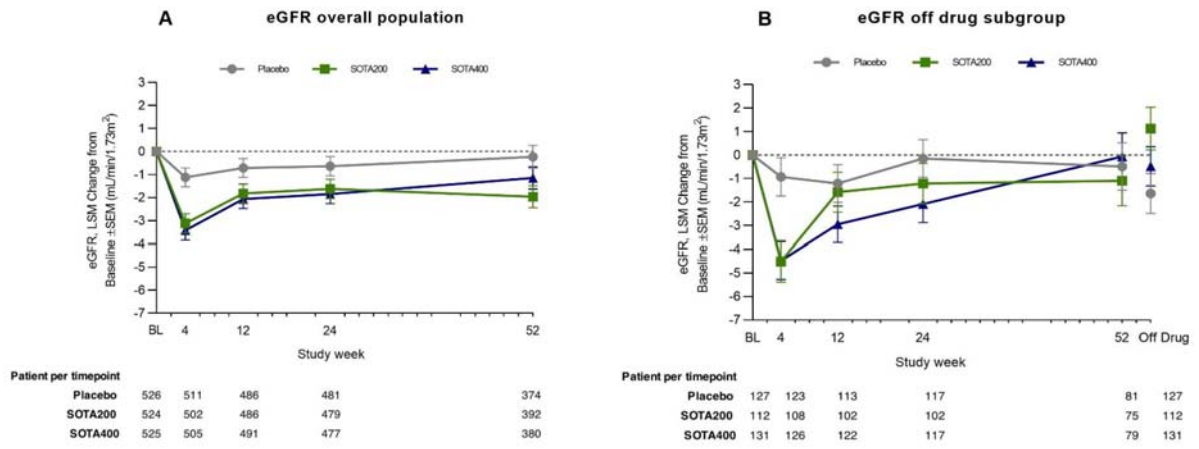

SUPPLEMENTARY DATA

Supplementary Figure S2. “Off drug” subgroup analysis 7 days after the last dose of SOTA

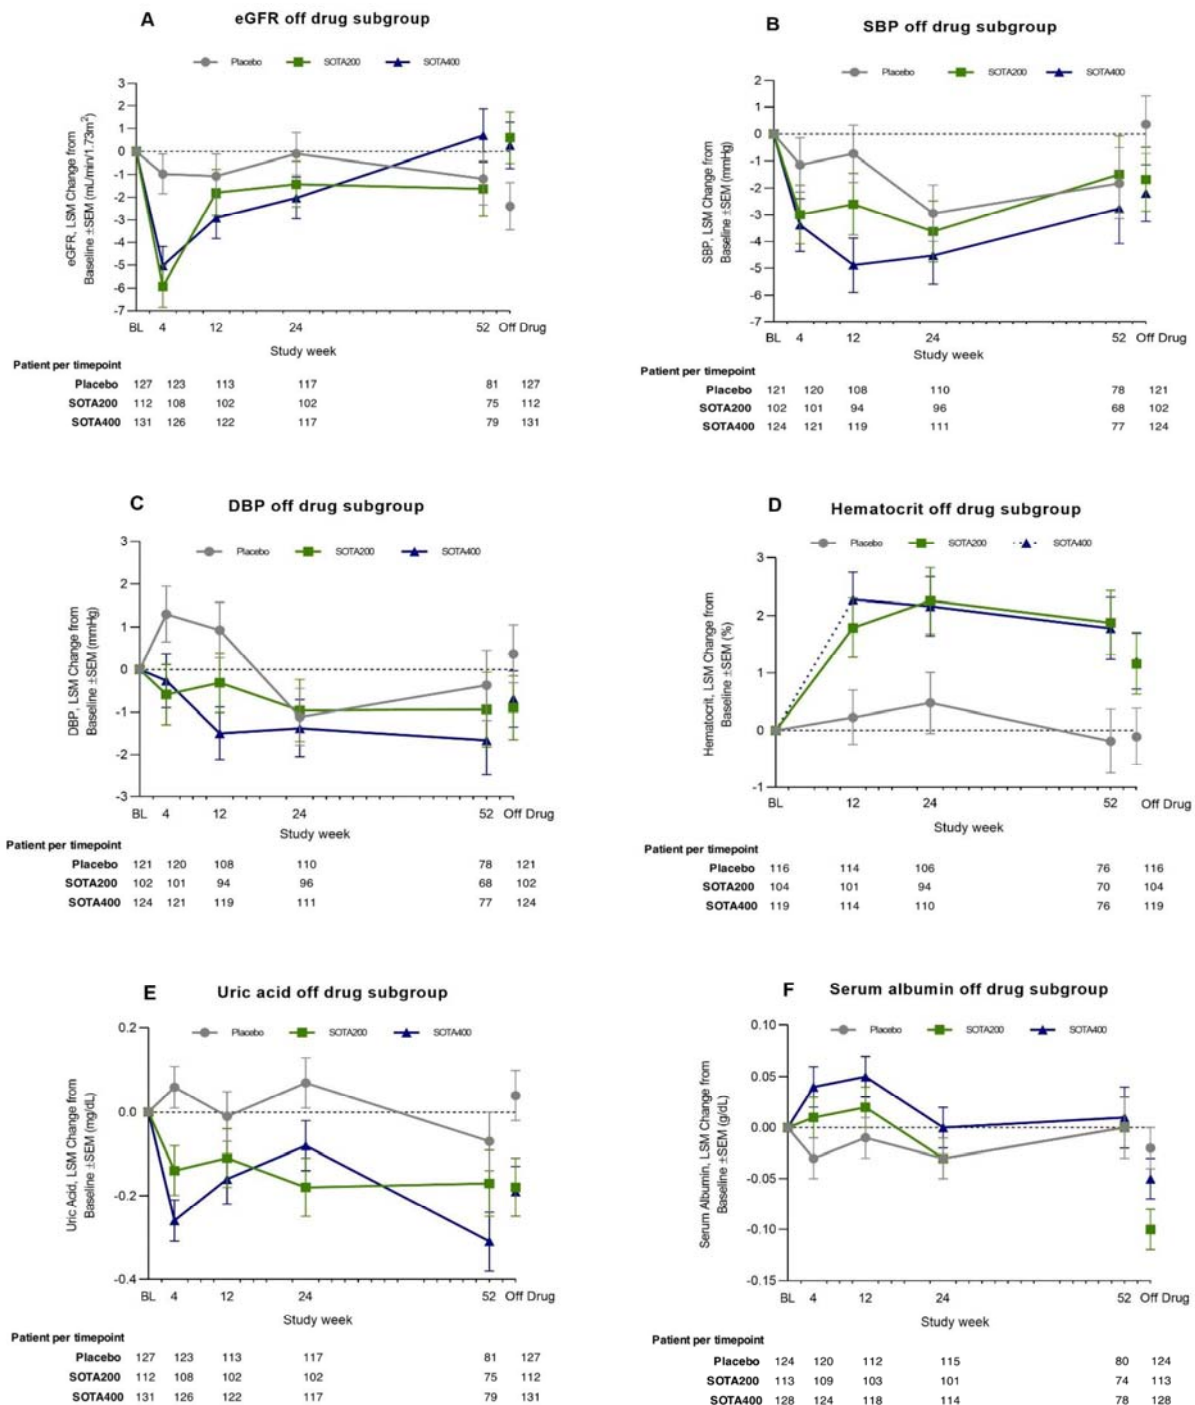

Subgroup of patients with off drug record. Off drug is defined as 7 days after last dose, with the window of 5–28 days. (A) eGFR. LS mean change (95% CI) from baseline vs. placebo at Week 52 for SOTA 200 mg:  $-0.4 \text{ mL/min/1.73 m}^2$  ( $-3.60, 2.73$ ),  $P = 0.79$ ; SOTA 400 mg:  $1.9 \text{ mL/min/1.73 m}^2$  ( $-1.23, 5.00$ ),  $P = 0.23$ ; Change from baseline with off drug record vs. placebo (95% CI) for SOTA 200 mg: 3.0

## SUPPLEMENTARY DATA

mL/min/1.73 m<sup>2</sup> (0.27, 5.70),  $P = 0.031$ ; SOTA 400 mg: 2.7 mL/min/1.73 m<sup>2</sup> (0.06, 5.27),  $P = 0.045$ . (B) SBP. LS mean change (95% CI) from baseline vs. placebo at Week 52 for SOTA 200 mg: 0.3 mmHg (-3.34 to 4.01),  $P = 0.86$ , SOTA 400 mg -0.9 mmHg (-4.48 to 2.61),  $P = 0.60$ ; Change from baseline with off drug record vs. placebo (95% CI) for SOTA 200 mg: -2.0 mmHg (-4.89 to 0.83),  $P = 0.16$ ; SOTA 400 mg: -2.5 mmHg (-5.26 to 0.17),  $P = 0.066$ . (C) DBP. LS mean change (95% CI) from baseline vs. placebo at Week 52 for SOTA 200 mg: -0.6 mmHg (-2.86 to 1.74),  $P = 0.63$ , SOTA 400 mg -1.3 mmHg (-3.51 to 0.94),  $P = 0.26$ ; Change from baseline with off drug record vs. placebo (95% CI) for SOTA 200 mg: -1.3 mmHg (-3.08 to 0.53),  $P = 0.17$ ; SOTA 400 mg: -1.1 mmHg (-2.77 to 0.65),  $P = 0.22$  (D) Hematocrit. LS mean change (95% CI) from baseline vs. placebo at Week 52 for SOTA 200 mg: 2.1% (1.35 to 2.81),  $P < 0.0001$ , SOTA 400 mg -2.0% (1.26 to 2.69),  $P < 0.0001$ ; Change from baseline with off drug record vs. placebo (95% CI) for SOTA 200 mg: 1.3% (0.62 to 1.93),  $P < 0.0001$ ; SOTA 400 mg: 1.3% (0.69 to 1.95),  $P < 0.0001$  (E) Serum uric acid. LS mean change (95% CI) from baseline vs. placebo at Week 52 for SOTA 200 mg: -0.1 mg/dL (-0.30 to 0.10),  $P = 0.33$ , SOTA 400 mg -0.2 mg/dL (-0.43 to -0.05),  $P = 0.016$ ; Change from baseline with off drug record vs. placebo (95% CI) for SOTA 200 mg: -0.2 mg/dL (-0.39 to -0.05),  $P = 0.0096$ ; SOTA 400 mg: -0.2 mg/dL (-0.40 to -0.08),  $P = 0.0040$  (F) Serum albumin. LS mean change (95% CI) from baseline vs. placebo at Week 52 for SOTA 200 mg: -0.00 g/dL (-0.07 to 0.07),  $P = 0.97$ , SOTA 400 mg: 0.01 g/dL (-0.06 to 0.08),  $P = 0.85$ ; Change from baseline with off drug record vs. placebo (95% CI) for SOTA 200 mg: -0.08 g/dL (-0.13 to -0.02),  $P = 0.0078$ ; SOTA 400 mg: -0.02 g/dL (-0.08 to 0.03),  $P = 0.44$ .

SUPPLEMENTARY DATA

Supplementary Figure S3.

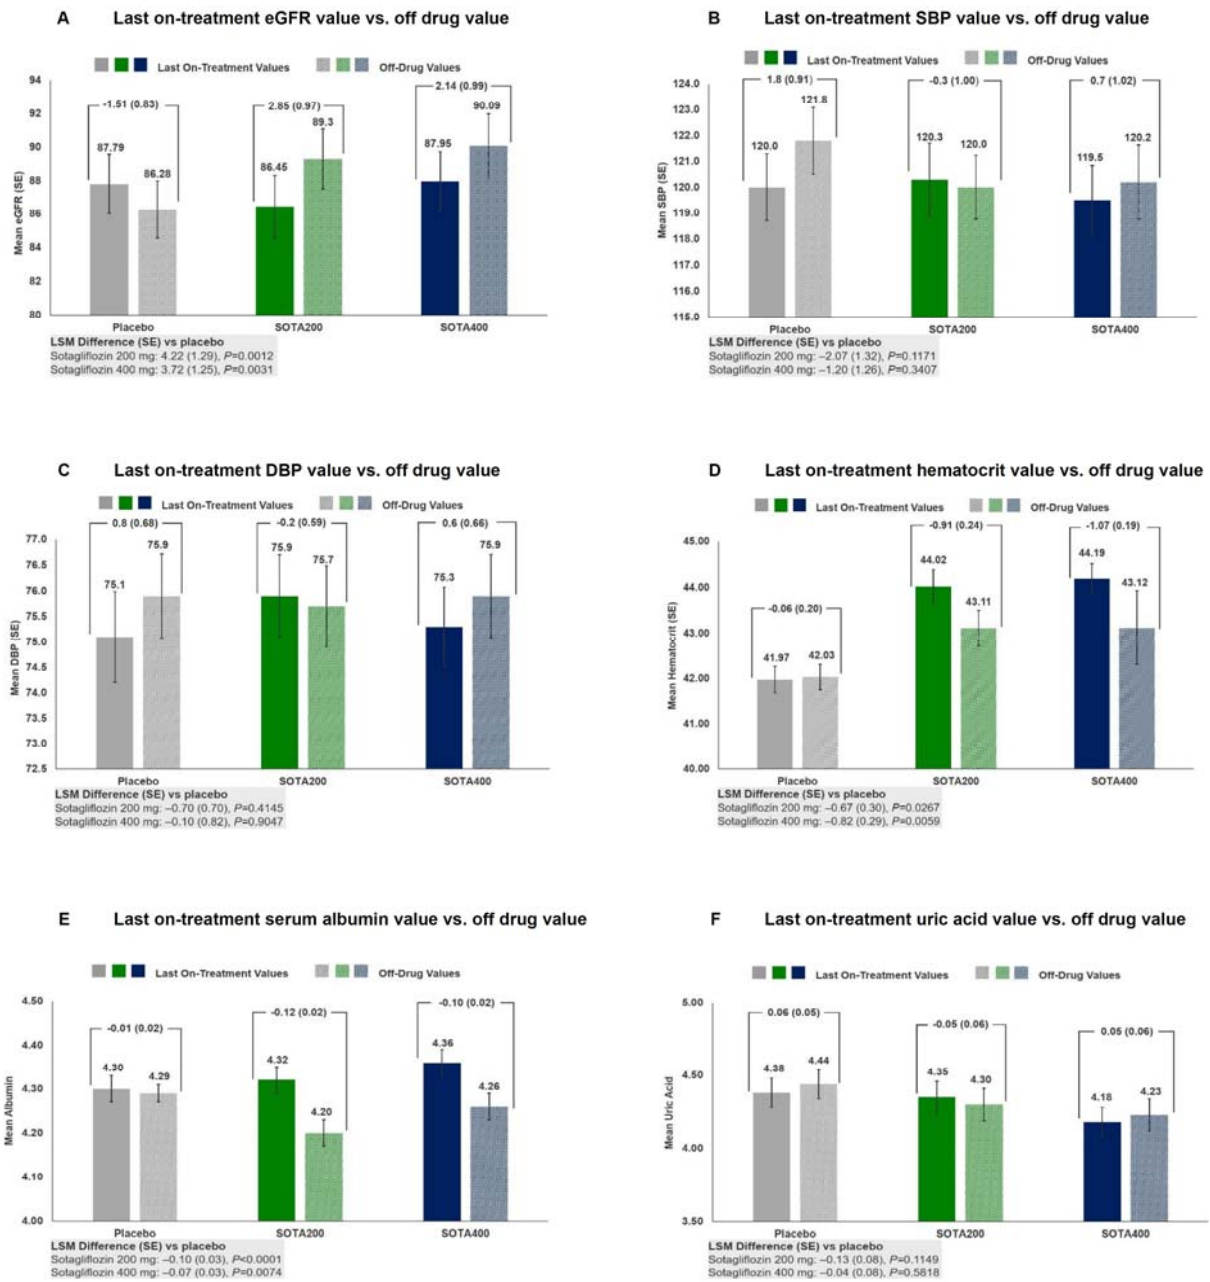

The last on-treatment value for a laboratory and vital signs variable is defined as the last value collected or taken, from both scheduled and unscheduled assessments, after the first dose of study drug and no more than 1 day after the last dose of study drug.
